# Supplementary material
Source: PubMed Central journal article supplement (PMC2614759)
Supplement: 0804871105_0804871105SI.pdf [file 0804871105_0804871105SI.pdf]

# Supporting Information

Wang et al. 10.1073/pnas.0804871105

## SI Materials and Methods

**Cell Culture and Transfection.** Human neuroblastoma M17 cells were grown as described before (1). Transfection was performed using Effectene (Qiagen) (2); 300  $\mu\text{g/ml}$  geneticin (Invitrogen) or 400  $\mu\text{g/ml}$  of hygromycin B (Calbiochem) was included in the medium for stable cell line selection. Stable cell lines were maintained with 100  $\mu\text{g/ml}$  geneticin or 200  $\mu\text{g/ml}$  of hygromycin.

**Antibodies.** Primary antibodies used included mouse anti-DLP1/OPA1 (BD), mouse anti-Mfn1 (Novus Biologicals), mouse anti-Mfn2 (Sigma), rabbit anti-Fis1 (Imgenex), mouse anti-APP (6E10, Signet), rabbit anti- $\alpha$ -tubulin (Epitomics) and mouse anti- $\alpha$ -tubulin/Myo (Cell Signaling).

**Expression Vectors.** Mito-DsRed2 (Clontech), APPwt and APPsw constructs (gift from Huaxi Xu, The Burnham Institute) were obtained. Mito-AcGFP was constructed by replacing DsRed2 with AcGFP (cDNA from Clontech) based on the Mito-DsRed2 vector. The expression plasmids for DsRed-Monomer tagged APPwt or APPsw were constructed based on pDsRed-Monomer-N1 Vector (Clontech). The expression plasmids for myc tagged wild type DLP1 (cDNA gift from Yisang Yoon, University of Rochester), myc tagged wild type OPA1 (cDNA gift from Luca Scorrano, Venetian Institute of Molecular Medicine, Italy) were constructed based on pCMV-Tag3 Vector (Stratagene). Dendra2 (Evrogen) is a commercial updated version of Dendra, a compound which readily changes from green to red fluorescent states when photoconverted by 400nm or 490nm light. We constructed mito-Dendra2 (based on pCMV vector from Clontech) containing a cleavable N-terminal mitochondrial targeting sequence from subunit VIII of cytochrome c oxidase (COXVIII) to drive Dendra2 specifically into the mitochondria matrix. By cotransfection with Mito-DsRed2, the specific localization of mito-Dendra2 in mitochondria was confirmed.

**Cell Treatments and Measurements.** Cells were seeded at low density on 6-well plates or in 4-well chamber slides and cultured for 24 h before treatments with  $\beta$ -secretase inhibitor IV (Calbiochem) in normal growth media. Treatments lasted 4 days at a concentration of 20 nM. ADDLs was prepared using  $A\beta_{1-42}$  peptide (California Peptide, Napa, CA), as described (3), except that phenol red free neurobasal medium (Invitrogen) was used. As a control,  $A\beta_{42-1}$  was subject to the same procedure before applying to cells. Primary hippocampal cells were usually transfected at DIV7 and treated with ADDLs 2 days after transfection. Cytotoxicity was measured by Cytotoxicity Detection Kit (LDH; Roche).  $A\beta_{1-42}$  level was determined by  $A\beta$  [1–42] ELISA KIT (Invitrogen). To differentiate M17 cells, serum content was reduced to 2% and 1  $\mu\text{M}$  retinoic acid (Sigma-Aldrich) was included in the culture media. ATP levels were measured by the ATP Determination Kit, ROS by  $\text{H}_2\text{DCFDA}$ , MMP by Rhodamine 123 (Rh123) and MMP-independent dye

Mitotracker Red 580 FM according to manufacturer's instructions (all from Invitrogen).

Western blot analysis, electron microscopy, and immunofluorescence were performed as described (2).

**Hippocampal Neuron Culture and Transfection.** Primary neurons from E18 rat hippocampus (BrainBits) were seeded at 30,000–40,000 cells per well on 8-well chamber slides coated with Poly-D-Lysine/Laminin (BD) in neurobasal medium supplemented with 2% B27 (Invitrogen)/0.5 mM glutamine/25 mM glutamate. Half the culture medium was changed every 3 d with neurobasal medium supplemented with 2% B27 (Invitrogen) and 0.5 mM glutamine. All cultures were kept at 37°C in a humidified 5%  $\text{CO}_2$  containing atmosphere. More than 90% cells were neurons after they were cultured for 7 days in vitro (DIV), verified by positive staining for neuronal specific markers microtubule-associated protein-2 (MAP2, dendritic marker) and Tau-1 (axonal marker). At DIV7, neurons were transfected using Neurofect (Genlantis) according to manufacturer's protocol.

**Mitochondria Isolation.** Mitochondria in M17 cells were isolated similarly as described before (4). Briefly, M17 cells were washed two times with Dulbecco's Phosphate-Buffered Saline (D-PBS, Invitrogen), and resuspended in ice cold permeabilization buffer containing 200 mM mannitol, 70 mM sucrose, 1 mM EGTA, 10 mM HEPES, 1 mM PMSF and protease inhibitor cocktail (Sigma). Cells were homogenized on ice with a 1-cc insulin syringe 27G1/2, drawing through the needle 20 times. Following centrifugation at  $600 \times g$  at 4°C for 20 min, the supernatant was collected, and centrifuged at  $8,000 \times g$  at 4°C for 15 min. The supernatant containing cytoplasmic proteins was stored at -20°C. The pellet was washed two times with permeabilization buffer. Finally, mitochondria were lysed with  $1 \times$  Cell Lysis Buffer (Cell Signaling), plus 1 mM PMSF (Sigma) and protease inhibitor cocktail (Sigma).

**Time-Lapse Imaging.** Cells were seeded in glass-bottomed dishes (MatTek) and transfected with Mito-Dendra2. 48 h after transfection, cells were put in a well-equipped live imaging station (Zeiss CTI-Controller 3700) with controlled  $\text{CO}_2$  content, humidity and temperature of stage, objective and the air. Images were captured with a Zeiss LSM 510 inverted laser-scanning confocal fluorescence microscope. Images of red signal were collected using 543-nm excitation light from an argon laser and a 560-nm long pass filter; green fluorescence was collected using 488-nm excitation light from an argon laser and a 500- to 550-nm band-pass barrier filter. Fast and sufficient photoswitch of Mito-dendra2 was achieved by exposing highly zoomed area to 1% 488-nm laser intensity for 7 iterations. During time-lapse imaging, frames were captured every 10s for at least 1h without apparent phototoxicity or photobleaching. Image analysis was also performed with open-source image-analysis programs WCIF ImageJ (developed by W. Rasband) and Image-Pro Plus 6.0 (Media Cybernetics).

1. Zhu X, et al. (2004) Neuroprotective properties of Bcl-w in Alzheimer disease. *J Neurochem* 89:1233–1240.  
2. Wang X, Su B, Fujioka H, Zhu X (2008) Dynamin-like protein 1 reduction underlies mitochondrial morphology and distribution abnormalities in fibroblasts from sporadic Alzheimer's disease patients. *Am J Pathol* 173:470–482.

3. Klein WL (2002) Abeta toxicity in Alzheimer's disease: Globular oligomers (ADDLs) as new vaccine and drug targets. *Neurochem Int* 41:345–352.  
4. Frezza C, Cipolat S, Scorrano L (2007) Organelle isolation: functional mitochondria from mouse liver, muscle and cultured fibroblasts. *Nat Protocols* 2:287–295.







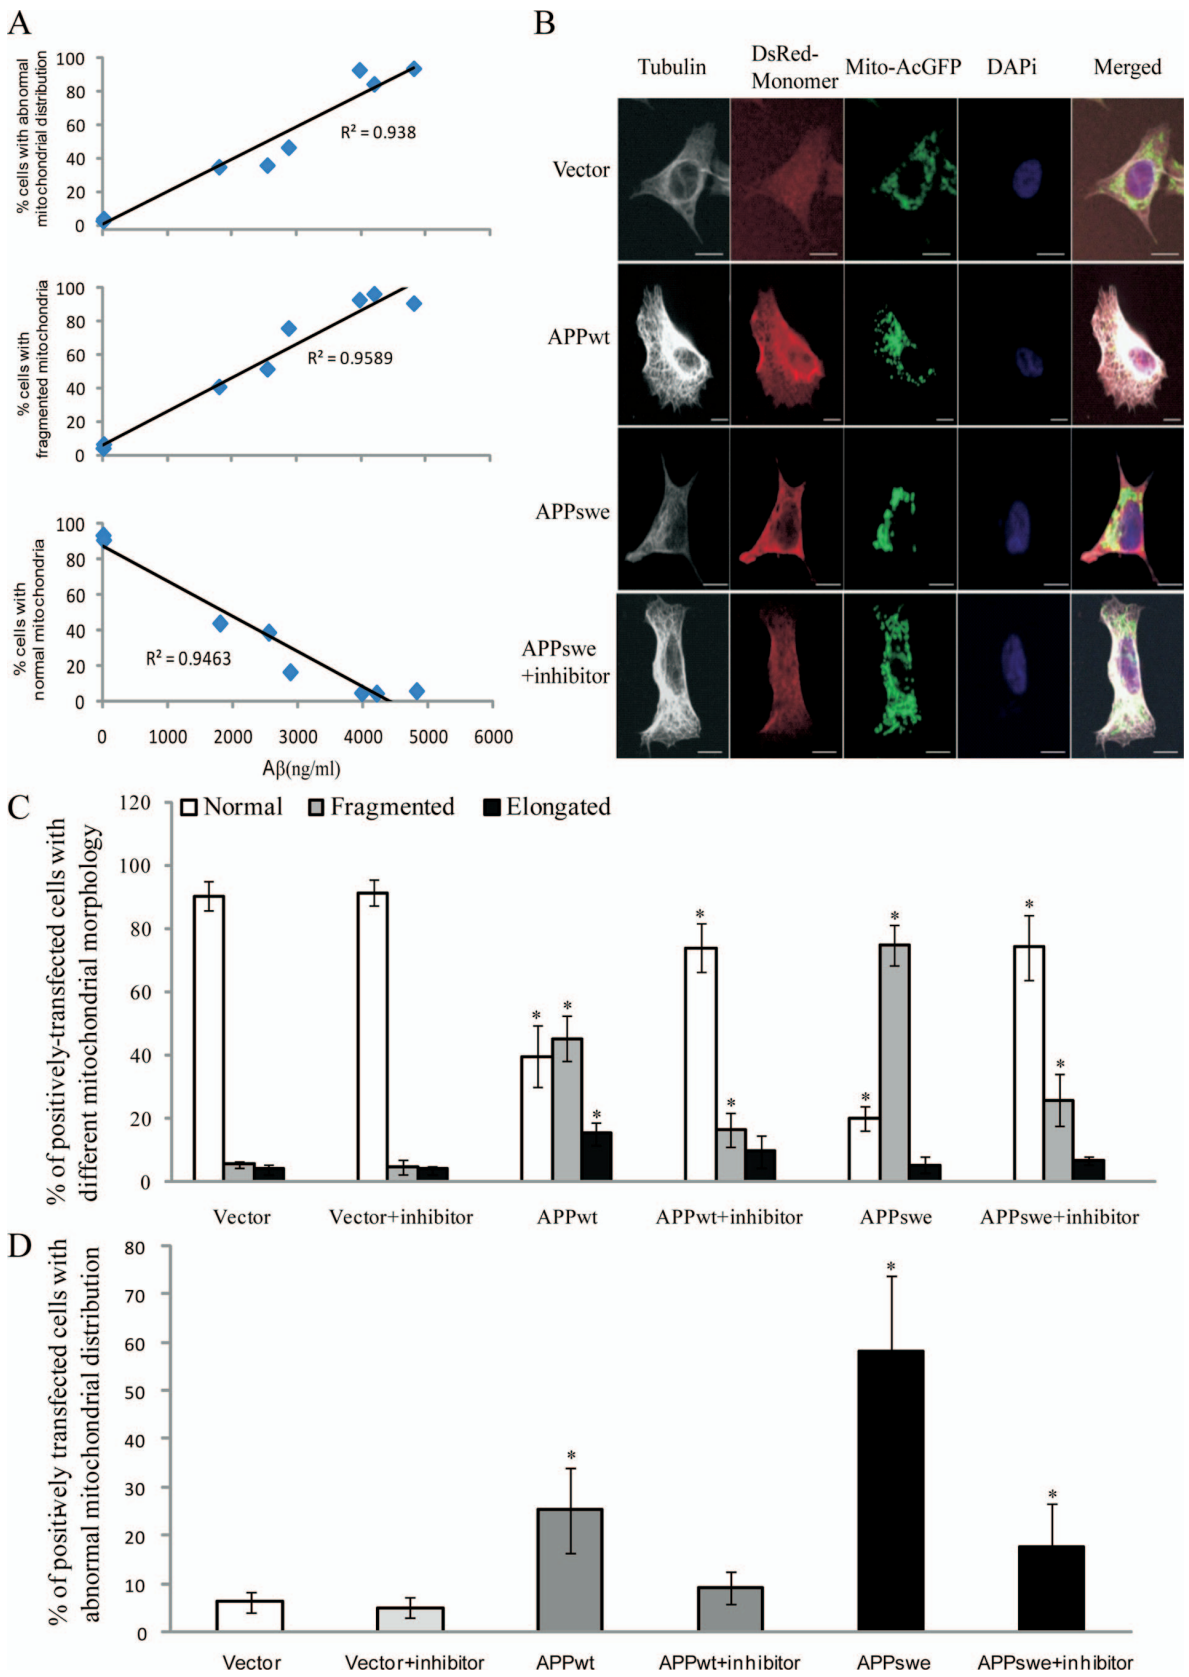

**Fig. S3.** (A) Quantification reveals that mitochondria abnormalities in APPwt or APPswe cells are correlated with Aβ1-42 levels secreted in the media (ng/ml, measure by ELISA). (B) Representative confocal microscopic pictures of wild type M17 cells transiently co-transfected with empty vector, DsRed-Monomer tagged wild type APP or mutant APPswe, and mito-AcGFP, either in the presence or absence of BACE inhibitor IV. White, Tubulin; Red, DsRed-Monomer; Green, mito-AcGFP; Blue, DAPI. (Scale bars, 10 μm.) (C and D) Quantitative analysis revealed that BACE inhibitor IV prevents APP-induced increase in abnormal mitochondria morphology (C) and distribution (D) (\*,  $P < 0.05$ ).













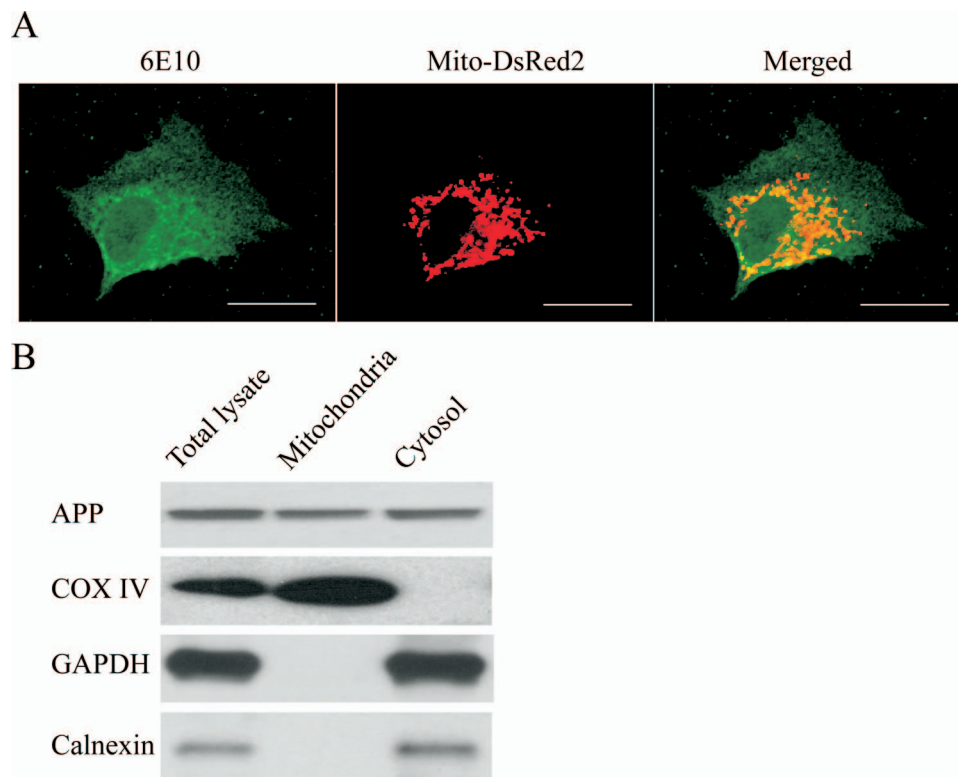

**Fig. S8.** Presence of APP in mitochondria in APPswe M17 cells. (A) APPswe cells were transfected with mito-DsRed2, fixed 2 days after transfection, and then stained with 6E10. Representative picture of positively transfected cells demonstrated co-localization between APP and mito-DsRed2 fluorescent signal. Red, DsRed; green, 6E10. (Scale bar, 20  $\mu$ m.) (B) Immunoblot analysis confirmed the presence of APP in mitochondrial fraction prepared from APPswe M17 cell lysates. The cytosolic fraction contains all of the cellular compartments with the exception of nuclei and mitochondria. The purity of mitochondria fraction was confirmed by immunoblot detection of the mitochondria-specific marker cytochrome c oxidase IV, but not the endoplasmic reticulum-specific marker Calnexin and the cytosol-specific marker GAPDH in this fraction.
